# Supplementary material for: Native and Non-Native Egg Parasitoids Associated with Brown Marmorated Stink Bug (Halyomorpha halys [Stål, 1855]; Hemiptera: Pentatomidae) in Western Slovenia
Source: MDPI journal article supplement (doi:10.3390/insects12060505), 2021-05-31
Supplement: s1 [file s1]

**Table S1.** Data on *Halyomorpha halys* oviposition hosts in agricultural, suburban and urban area found in Goriška region (Western Slovenia).

| Area              | Host plant                         | No. of Egg Masses Collected | No. of Eggs | No. of Egg Masses Parazitized | No. of Eggs Parazitized | Parasitism Rate (%) | Parasitoid Species Composition (%) |       |       |       |
|-------------------|------------------------------------|-----------------------------|-------------|-------------------------------|-------------------------|---------------------|------------------------------------|-------|-------|-------|
|                   |                                    |                             |             |                               |                         |                     | AB                                 | TM    | TB    | Tel   |
| Agricultural area | <i>Malus domestica</i>             | 41                          | 1052        | 5                             | 90                      | 8.6                 | 51.1                               | 48.9  | 0     | 0     |
|                   | <i>Actinidia deliciosa</i>         | 17                          | 460         | 4                             | 30                      | 6.5                 | 100.0                              | 0     | 0     | 0     |
|                   | <i>Olea europea</i>                | 24                          | 600         | 9                             | 92                      | 15.3                | 88.0                               | 16.0  | 0     | 0     |
|                   | <i>Pyrus pyrifolia</i>             | 7                           | 197         | 3                             | 30                      | 15.2                | 0                                  | 100.0 | 0     | 0     |
|                   | <i>Corylus avellana</i>            | 8                           | 215         | 1                             | 1                       | 0.5                 | 100.0                              | 0     | 0     | 0     |
|                   | <i>Prunus avium</i>                | 4                           | 112         | 0                             | 0                       | 0.0                 | 0                                  | 0     | 0     | 0     |
|                   | <i>Zea mays</i>                    | 4                           | 111         | 2                             | 24                      | 21.6                | 91.7                               | 8.3   | 0     | 0     |
|                   | <i>Vitis vinifera</i>              | 1                           | 28          | 0                             | 0                       | 0.0                 | 0                                  | 0     | 0     | 0     |
|                   | <i>Pyrus communis</i>              | 2                           | 56          | 0                             | 0                       | 0.0                 | 0                                  | 0     | 0     | 0     |
|                   | <i>Prunus dulcis</i>               | 1                           | 28          | 0                             | 0                       | 0.0                 | 0                                  | 0     | 0     | 0     |
|                   | <i>Clematis vitalba</i>            | 1                           | 28          | 0                             | 0                       | 0.0                 | 0                                  | 0     | 0     | 0     |
|                   | <i>Robinia pseudoacacia</i>        | 1                           | 28          | 0                             | 0                       | 0.0                 | 0                                  | 0     | 0     | 0     |
| TOTAL             |                                    | 111                         | 2747        | 24                            | 267                     | 9.7                 |                                    |       |       |       |
| Suburban area     | <i>Actinidia deliciosa</i>         | 6                           | 155         | 2                             | 22                      | 14.2                | 81.8                               | 0     | 0     | 18.2  |
|                   | <i>Olea europea</i>                | 1                           | 27          | 1                             | 22                      | 81.5                | 100.0                              | 0     | 0     | 0     |
|                   | <i>Corylus avellana</i>            | 1                           | 14          | 1                             | 13                      | 92.9                | 0                                  | 00    | 0     | 100.0 |
|                   | <i>Vitis vinifera</i>              | 2                           | 42          | 2                             | 30                      | 71.4                | 53.3                               | 46.7  | 0     | 0     |
|                   | <i>Prunus domestica</i>            | 2                           | 56          | 1                             | 28                      | 50.0                | 100.0                              | 0     | 0     | 0     |
|                   | <i>Solanum lycopersicum</i>        | 1                           | 26          | 1                             | 13                      | 50.0                | 0                                  | 0     | 100.0 | 0     |
|                   | <i>Catalpa bignonioides</i>        | 18                          | 494         | 5                             | 99                      | 20.0                | 14.1                               | 85.9  | 0     | 0     |
|                   | <i>Paulownia tomentosa</i>         | 2                           | 54          | 1                             | 12                      | 22.2                | 100.0                              | 0     | 0     | 0     |
|                   | <i>Monarda didyma</i>              | 1                           | 26          | 1                             | 2                       | 7.7                 | 100.0                              | 0     | 0     | 0     |
|                   | <i>Parthenocissus tricuspidata</i> | 9                           | 249         | 0                             | 0                       | 0.0                 | 0                                  | 0     | 0     | 0     |
|                   | <i>Buddleja davidii</i>            | 1                           | 28          | 0                             | 0                       | 0.0                 | 0                                  | 0     | 0     | 0     |
|                   | <i>Hydrangea macrophylla</i>       | 1                           | 28          | 0                             | 0                       | 0.0                 | 0                                  | 0     | 0     | 0     |

|                   |                             |           |             |           |            |             |       |   |    |   |
|-------------------|-----------------------------|-----------|-------------|-----------|------------|-------------|-------|---|----|---|
|                   | <i>Hibiscus syriacus</i>    | 1         | 27          | 0         | 0          | 0.0         | 0     | 0 | 0  | 0 |
| <b>TOTAL</b>      |                             | <b>46</b> | <b>1226</b> | <b>15</b> | <b>241</b> | <b>19.7</b> |       |   |    |   |
| <b>Urban area</b> | <i>Catalpa bignonioides</i> | 5         | 137         | 1         | 19         | 13.9        | 100.0 | 0 | 0  | 0 |
|                   | <i>Acer platanooides</i>    | 12        | 321         | 5         | 80         | 24.9        | 100.0 | 0 | 00 | 0 |
| <b>TOTAL</b>      |                             | <b>17</b> | <b>458</b>  | <b>6</b>  | <b>99</b>  | <b>21.6</b> |       |   |    |   |

AB = *Anastatus bifasciatus*, TM = *Trissolcus mitsukurii*, TB = *Trissolcus basalis*, Tel = *Telenomus* sp.
